# Supplementary material for: Association of Bcr-Abl Tyrosine Kinase Inhibitors With Hepatitis B Virus Reactivation Requiring Antiviral Treatment in Taiwan
Source: PubMed Central journal article supplement (PMC8025118; doi:10.1001/jamanetworkopen.2021.4132), 2021-04-06
Supplement: jamanetwopen-e214132-s001.pdf [file jamanetwopen-e214132-s001.pdf]

## Supplemental Online Content

Wang LY, Chu SC, Lo Y, Yang YY, Chan KA. Association of Bcr-Abl tyrosine kinase inhibitors with hepatitis B virus reactivation requiring antiviral treatment in Taiwan. *JAMA Netw Open*. 2021;4(4):e214132. doi:10.1001/jamanetworkopen.2021.4132

**eTable.** Anatomical Therapeutic Chemical (ATC) Classification Codes for Drugs, Taiwan National Health Insurance Codes for Procedures of Interest, and *ICD-9-CM* Codes for Diseases of Interest

This supplemental material has been provided by the authors to give readers additional information about their work.

eTable. Anatomical Therapeutic Chemical (ATC) Classification Codes for Drugs, Taiwan National Health Insurance Codes for Procedures of Interest, and *ICD-9-CM* Codes for Diseases of Interest

| Drug                  | ATC                                    |
|-----------------------|----------------------------------------|
| lamivudine            | J05AF05                                |
| tenofovir             | J05AF07                                |
| adefovir dipivoxil    | J05AF08                                |
| entecavir             | J05AF10                                |
| telbivudine           | J05AF11                                |
| imatinib              | L01XE01                                |
| datatinib             | L01XE06                                |
| nilotinib             | L01XE08                                |
| 5-fluorouracil        | L01BC02, L01BC52                       |
| gemcitabine           | L01BC05                                |
| capecitabine          | L01BC06                                |
| methotrexate          | L01BA01, L04AX03                       |
| oxaliplatin           | L01XA03                                |
| carboplatin           | L01XA02                                |
| cyclophosphamide      | L01AA01                                |
| doxorubicin           | L01DB01                                |
| epirubicin            | L01DB03                                |
| irinotecan            | L01XX19                                |
| etoposide             | L01CB01                                |
| paclitaxel            | L01CD01                                |
| docetaxel             | L01CD02                                |
| vinorelbine           | L01CA04                                |
| azathioprine          | L04AX01                                |
| cyclosporin           | L04AD01                                |
| mycophenolate         | L04AA06                                |
| rituximab             | L01XC02                                |
| cytarabine            | L01BC01                                |
| daunorubicin          | L01DB02                                |
| idarubicin            | L01DB06                                |
| everolimus            | L01XE10, L04AA18                       |
| sirolimus             | L04AA10, L01XE09                       |
| tacrolimus            | L04AD02                                |
| prednisolone          | H02AB06                                |
| methylprednisolone    | H02AB04                                |
| dexamethasone         | H02AB02                                |
| hydrocortisone        | H02AB09                                |
| Procedure of interest | Taiwan National Health Insurance codes |
| HBeAg measurement     | 14034C, 14035C, 27035B                 |
| Anti-Hbe measurement  | 14036C and 27036B                      |

|                                                             |                                                                                   |
|-------------------------------------------------------------|-----------------------------------------------------------------------------------|
| Receiving chemotherapy in the clinics                       | 37031B, 37032B, 37033B, 37038B,37039B, 37040B, 37041B                             |
| Autologous stem-cell transplantation                        | 94202B, 94207B, 94202A                                                            |
| Allogeneic stem cell transplantation                        | 94201B, 94206B, 94204B, 94201A, 48006C1                                           |
| Diagnosis                                                   | International classification of Disease, 9th revision, Clinical Modification code |
| Cirrhosis                                                   | 571.0, 571.1, 571.2, 571.3, 571.6                                                 |
| Chronic myeloid leukemia                                    | 205.1                                                                             |
| Monocytic leukemia                                          | 206                                                                               |
| Acute lymphoblastic leukemia                                | 204                                                                               |
| Acute myeloid leukemia                                      | 205                                                                               |
| Gastrointestinal stromal tumor                              | 238-239                                                                           |
| Other cancers (except aforementioned hematologic disorders) | 140-208                                                                           |
